# Supplementary material for: Flexible Janus-structured porous fluorescent nanofibers with white-light emission
Source: Royal Society of Chemistry journal article supplement (doi:10.1039/d3tc01358h), 2023-01-01
Supplement: d3tc01358h1.pdf [file d3tc01358h1.pdf]

## Electronic Supplementary Information

### Flexible Janus-structured porous fluorescent nanofibers with white-light emission

Minghui Zhang,<sup>a</sup> Shikun Zhao,<sup>a</sup> Zhen Qin,<sup>a</sup> Yuhuan Lv,<sup>a</sup> Han Zhu,<sup>b</sup> Biao Zhao,<sup>\*a</sup> and Kai Pan<sup>\*a</sup>

<sup>a</sup>Beijing Key Laboratory of Advanced Functional Polymer Composites, State Key Laboratory of Organic-Inorganic Composites, College of Materials Science and Engineering, Beijing University of Chemical Technology, Beijing 100029, China.

<sup>b</sup>College of Materials Science and Engineering, Beijing University of Chemical Technology, Beijing, 100029, China.

\*E-mail: pankai@mail.buct.edu.cn; zhaobiao@mail.buct.edu.cn

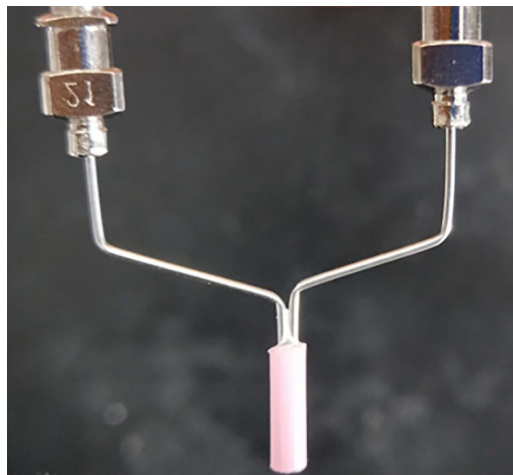

**Fig. S1** Photo of Janus-structured spinneret.

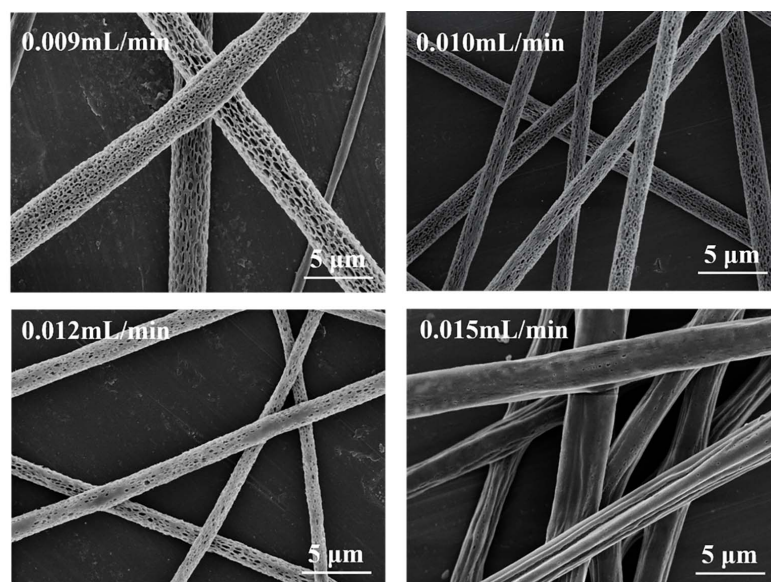

**Fig. S2** SEM images of porous Janus-NFs prepared with different flow rate of spinning solution.

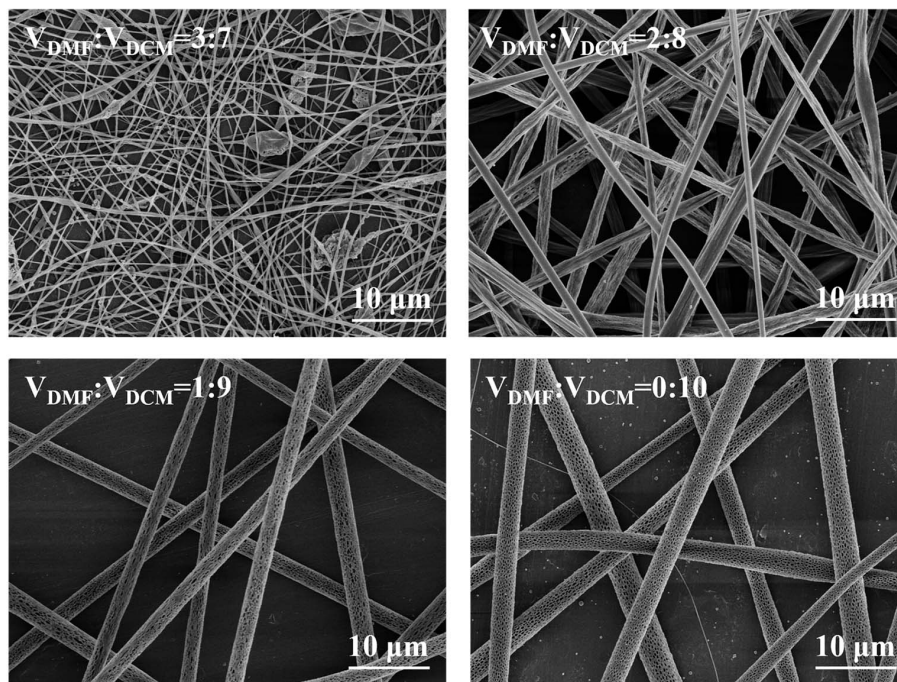

**Fig. S3** SEM images of porous Janus-NFs prepared with different volume ratios of mixed DMF/DCM solution.

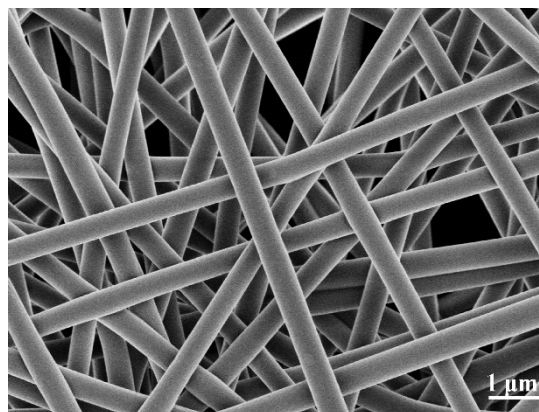

**Fig. S4** SEM image of non-porous Janus-NFs.

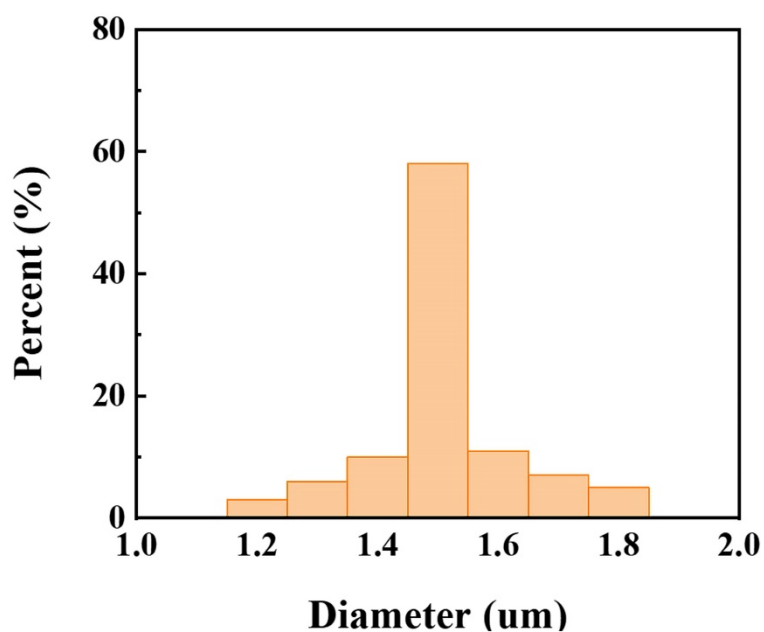

Fig. S5 The diameter distribution of porous Janus-NFs.

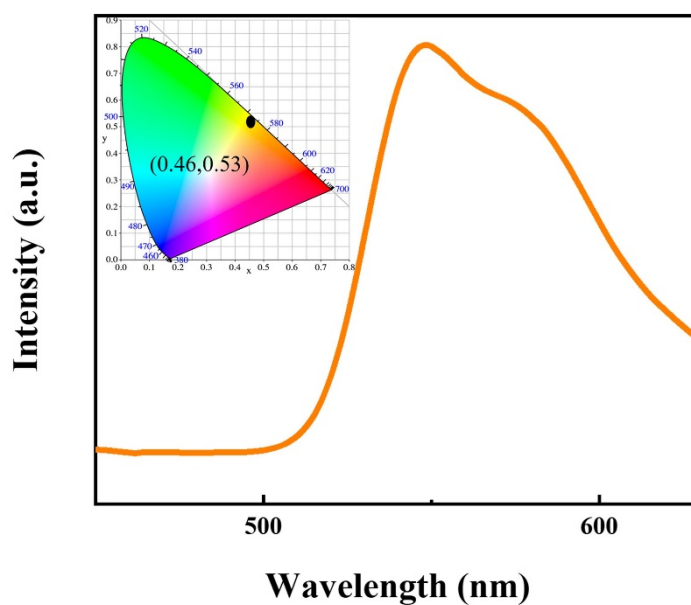

Fig. S6 Fluorescence spectra of the porous O-NFs.

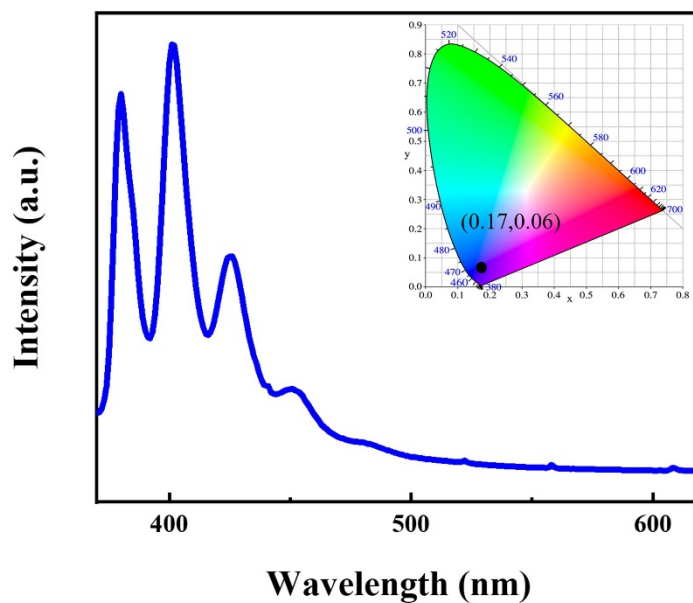

Fig. S7 Fluorescence spectra of the porous B-NFs.

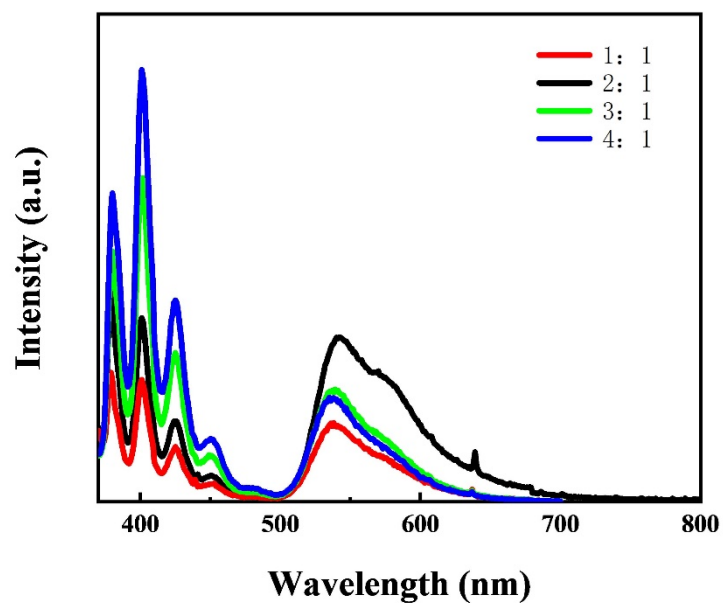

Fig. S8 Fluorescence spectra of porous Janus-NFs with different mass ratios of B and O: 1:1, 2:1, 3:1, 4:1.

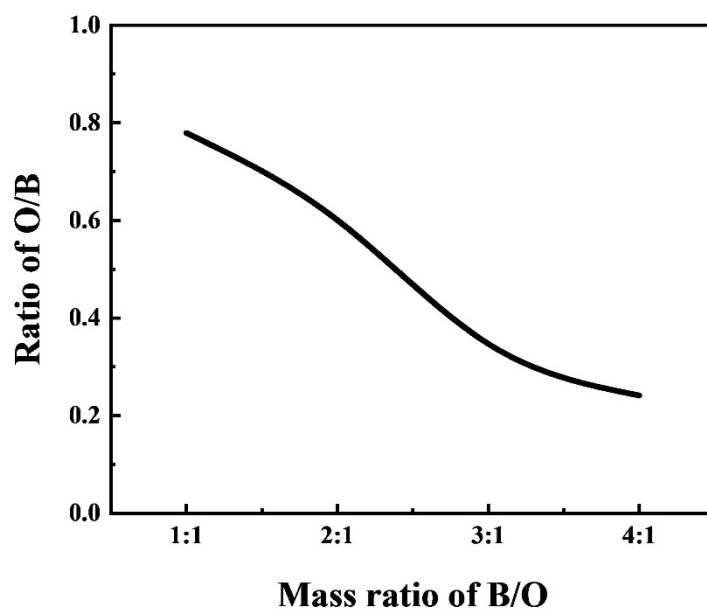

Fig. S9 Ratio of peak intensities corresponding to O/B fluorescence spectra.

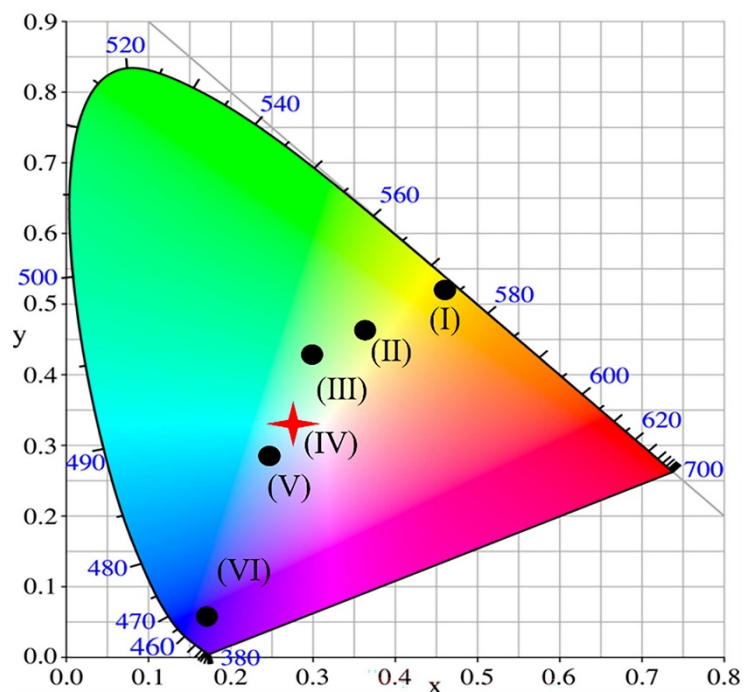

Fig. S10 The CIE diagram of porous Janus-NFs prepared by different mass ratios of B and O: (I) 0:1, (II) 1:1, (III) 2:1, (IV) 3:1, (V) 4:1, (VI) 1:0.

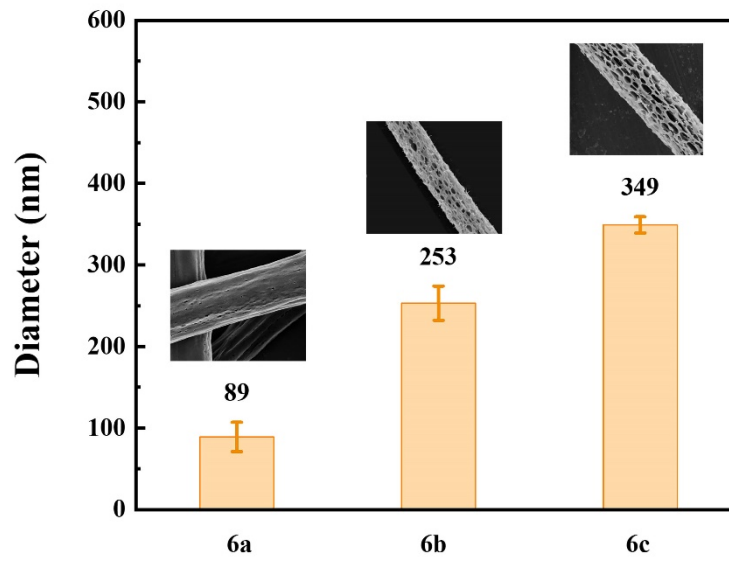

**Fig. S11** The corresponding pore sizes of porous Janus-NFs with different micropore structures in Fig. 6a-c.

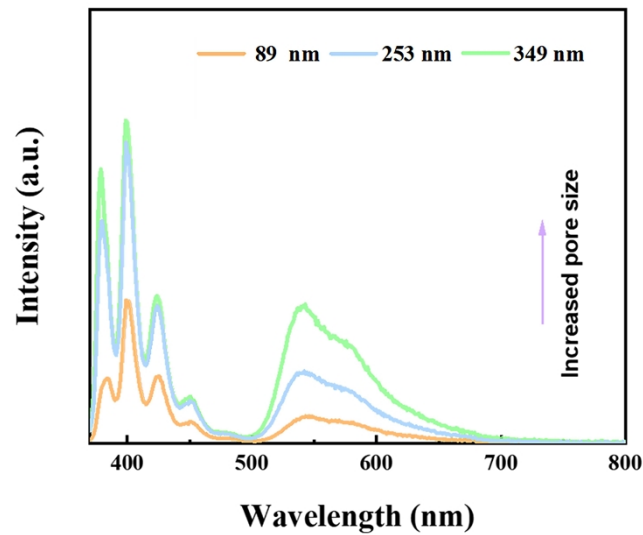

**Fig. S12** Fluorescence spectra of porous Janus-NFs with different pore sizes.

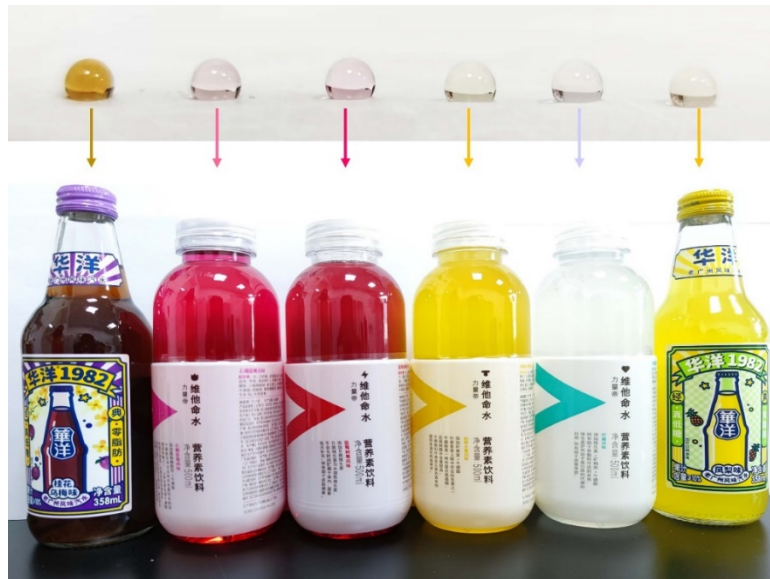

**Fig. S13** The composition of different colored droplets in Fig. 6d.
